# Supplementary material for: Opportunity to inform social needs within a hospital setting using data-driven patient engagement
Source: HighWire-hosted journal article supplement (doi:10.1136/bmjoq-2021-001540), 2021-10-01
Supplement: bmjoq-2021-001540supp001_data_supplement.pdf [file bmjoq-2021-001540supp001_data_supplement.pdf]

**ICD 10 Codes and Other Markers**

| <b>Category</b>                       | <b>ICD 10 codes or flags used for identification</b>                                                                                                                                                                                                                               |
|---------------------------------------|------------------------------------------------------------------------------------------------------------------------------------------------------------------------------------------------------------------------------------------------------------------------------------|
| <b>Avoidable visit</b>                | G40-G41, J41-J44, J47, J10.0, J11.0, J12-J16, J18, J20-J22, J45, E10.0, E10.1, E10.63, E10.64, E10.9, E11.0, E11.1, E11.63, E11.64, E11.9, E13.0, E13.1, E13.63, E13.64, E13.9, E14.0, E14.1, E14.63, E14.64, E14.9, I50, J81, I10.0, I10.1, I11, I20, I23.82, I24.0, I24.8, I24.9 |
| <b>Visit related to substance use</b> | F10-F19, F55, L27, R78, T38, T42.0, T45.1, T46.0, T80.2, T80.9, T80.8, T88.4, T88.6, T88.7                                                                                                                                                                                         |
| <b>Visit related to mental health</b> | F20-F25, F28-F34, F39-F45, F48, F60, F63-F66, F68-F69, X60-X84                                                                                                                                                                                                                     |
| <b>Palliative visit</b>               | Z51, Z54                                                                                                                                                                                                                                                                           |
| <b>Visit related to homelessness</b>  | Z59                                                                                                                                                                                                                                                                                |
| <b>Patient with no fixed address</b>  | Postal code starting with U or X                                                                                                                                                                                                                                                   |
